# Supplementary material for: Phenotypic Analysis and Molecular Characterization of Enlarged Cell Size Mutant in Nannochloropsis oceanica
Source: Int J Mol Sci. 2023 Sep 2;24(17):13595. doi: 10.3390/ijms241713595 (PMC10487731; doi:10.3390/ijms241713595)
Supplement: Supplementary file 1 [file ijms-24-13595-s001.zip › supplementary.xlsx]

## Sheet: Table S1.
Table S1. The primers and sequence in this study
Primer name	Primer sequence (5' - 3')	Usage
gDNA-Insert-F	CCTGTGTGAAATGCAGATAG	Amplification of N. oceanica IMET1 genome fragment
gDNA-Insert-R	GGTTGATACGAAACGAGGTC
qPCR-UBCE-F	CTCTTCCACCCGAACGTCTA	Internal control for qRT-PCR
qPCR-UBCE-R	GTCCAACAGGTCCTGAATGC
qPCR-CYCU;1-F	GAGGAACAGTGACGTTTCGG	Expression analysis of CYCU;1
qPCR-CYCU;1-R	TGAGGCTGCTGGTAGTCAAA
qPCR-CYCB;3-F	TTATCGCCTACTCCGGCTAC	Expression analysis of CYCB;3
qPCR-CYCB;3-R	TCTCGGCCCACTTACTGGAG
qPCR-CYCD;1-F	ATCCCTGTCGCGCTACTCAG	Expression analysis of CYCD;1
qPCR-CYCD;1-R	TTGCTGGCTGCCAGGAACAC
qPCR-CYCH;1-F	GGATCTGGGAATGGTTGAGC	Expression analysis of CYCH;1
qPCR-CYCH;1-R	TCTCCATCCGACTCTGCTTC
qPCR-CYCL;2-F	GTCTTCCATCACATGTGTCG	Expression analysis of CYCL;2
qPCR-CYCL;2-R	TGTGGGTGGTCCATCACATT
qPCR-CYCP;3-F	AAGACCTGTCTTCGTGGAAC	Expression analysis of CYCP;3
qPCR-CYCP;3-R	CAAGGCGAAGTAGTACTTCG
qPCR-CYCP;4-F	AAGTGTGGGACGATCGATGC	Expression analysis of CYCP;4
qPCR-CYCP;4-R	GGTGTAGAGAGCTTGTGACA
qPCR-CDKA;1-F	TCTACCCTGGTATAGTGGAG	Expression analysis of CDKA;1
qPCR-CDKA;1-R	TCTCGCTGATATCCTCTTCG
qPCR-CDKC;1-F	GCAAGGCGATAGATATGTGG	Expression analysis of CDKC;1
qPCR-CDKC;1-R	GTTCTCTTCACGAACCTTGG
qPCR-CDKD;1-F	TATTCACATCCGGTTGGCAC	Expression analysis of CDKD;1
qPCR-CDKD;1-R	CTGATCCATGTCATTCTGTC
qPCR-CDKG;2-F	ACATTGCGATTGACATGTGG	Expression analysis of CDKG;2
qPCR-CDKG;2-R	AAGCTATGTGCGGTAGCCTC
qPCR-RB-F	TGCTGCCTCGAGGTCTTAGC	Expression analysis of RB
qPCR-RB-R	CTCCACGTCCAGCAAATGCG
qPCR-E2F-F	AGTTGCAACGGGATATGGAG	Expression analysis of E2F
qPCR-E2F-R	TGATGCTCGAAGCATGGGAG
qPCR-DP1-F	TCTTGCAAGAGCTGATTCGG	Expression analysis of DP1
qPCR-DP1-R	AGTAGCACCAGCAGATGAAC

## Sheet: Table S2.
Table S2. Cell area measurements for WT and ECS
Day	Mean cell aera (μm2)
	WT	ECS
2	7.273 ± 0.1503	9.499 ± 0.2642
4	7.202 ± 0.1679	8.506 ± 0.2076
6	6.843 ± 0.1373	7.472 ± 0.1408
8	6.658 ± 0.1492	7.306 ± 0.1215
10	5.951 ± 0.09278	7.294 ± 0.1062
12	6.675 ± 0.1111	7.814 ± 0.1187
14	7.671 ± 0.1669	8.557 ± 0.1425
16	7.990 ± 0.1684	9.243 ± 0.1864
Results are provided as means ± SD using GraphPad Prism.

## Sheet: Table S3.
Table S3. The conserved motifs identified from 19 cyclin proteins.
Motif	The width of the motif (aa)	E-value	The name of the query motif	NoCYC proteins in which motif is present	Description in InterProScan
1	65	1.8e-117	RMRAKLLDFLVRLHKKLKLSPETLYLALVYLDRFLQEVSVLRFALQLVAAAALFLAAKYEELDSP	Except CYCP;2	Pfam PF00134 Cyclin, N-terminal domain; ProSitePatterns PS00292 Cyclins signature.; Gene3D G3DSA:1.10.472.10; SMART SM00385 cyclin_7; SUPERFAMILY SSF47954 Cyclin-like; CDD cd00043 CYCLIN
2	50	3.4e-47	QQHQHEEQQQQQQQQQQQQQQQQQQZLSSQQSKGNGHAPQQQQLQRQPHS	Except CYCU;2; CYCA;1; CYCD;1; CYCB;1; CYCB;3; CYCH;1; CYCL;3; CYCL;2
3	50	1.4e-21	DGSATSSSGASSSSSSSSSSSSSSSSSSSSSSSSSSSASAGSSPSSSRKS	Except CYCU;2; CYCU;1; CYCP;3; CYCD;2; CYCB;1; CYCL;3
4	50	1.3e-10	ALELYYARAPGVPLKEINELEREFLRLLKYDLTVPPSLYAAYYYELRSLV	Only CYCU;2 CYCY;1; CYCP;3; CYCP;4; CYCP;2; CYCA;2; CYCP;1	Pfam PF08613 Cyclin; Gene3D G3DSA:1.10.472.10
5	50	0.0079	TPSLTAYSGYTEEELLPCARLJSPWVKETTQTLSARRLNAVKRKFASTKW	Only CYCB;2; CYCD;1; CYCB;1; CYCB;3	SUPERFAMILY SSF47954 Cyclin-like; Gene3D G3DSA:1.10.472.10; Pfam PF02984 Cyclin, C-terminal domain
6	50	0.019	SEVYDEALPEYKPQVIDYEKILLHGLGFDLTVYHPYRPFLDLVKSLRAVY	Only CYCH;1; CYCL;4; CYCL;1; CYCT;1	Gene3D G3DSA:1.10.472.10

## Sheet: Table S4.
Table S4. FPKM of cyclin genes under different conditions.
Gene	Under light/dark cycle-FPKM， NCBI: PRJNA285666								Under phosphate deprivation-FPKM，NCBI: PRJNA629048					Under different CO2 concentration-FPKM， NCBI: PRJNA241382									Under nitrogen replete or deprivated-FPKM， NCBI: PRJNA182180
	ZT0h	ZT3h	ZT6h	ZT9h	ZT12h	ZT15h	ZT18h	ZT21h	PD0h	PD6h	PD12h	PD24h	PD48h	WT	VLC3h	HC3h	VLC6h	HC6h	VLC12h	HC12h	VLC24h	HC24h	CK3h	CK4h	CK6h	CK12h	CK24h	CK48h	ND3h	ND4h	ND6h	ND12h	ND24h	ND48h
CYCL;1	19.0678	22.1876	19.148	18.0282	12.8836	23.495	32.6893	31.4957	21.1537	21.8854	20.5272	23.984	20.6136	26.0246	15.5222	19.6289	19.0896	22.239	16.8661	16.9387	20.6888	21.4143	15.6698	15.9435	15.5664	12.5727	16.5384	14.2424	14.2274	12.295	17.1514	12.1544	19.7	18.4835
CYCH;1	38.2091	33.6138	26.4136	19.0674	21.2523	23.7726	32.4537	36.7044	24.2878	24.5223	20.8712	23.5983	21.0026	21.7417	21.826	19.2371	13.5994	14.0839	11.7608	8.53207	25.5658	20.1857	11.5957	8.1538	8.12145	8.25343	10.8264	9.48891	9.04298	6.11218	5.2026	4.99185	11.3226	10.1506
CYCT;1	0.0274028	6.59368	0.874984	0.155713	5.25151	0.00873258	0.0171583	6.59907	15.9714	11.6311	10.5867	13.3905	13.9	15.6607	12.2786	11.1269	8.22288	9.05721	5.48446	3.83892	12.0999	10.9093	11.4263	9.40413	8.09067	6.45166	11.1144	8.22488	10.9301	9.57675	7.55582	6.27779	13.37	14.9089
CYCP;1	4.07796	3.12258	10.0135	13.1876	12.2882	6.91429	8.6809	5.58011	7.71591	10.1116	8.53807	14.1398	12.1627	0.519387	0.553133	0.474797	3.16792	2.1005	6.26642	2.56597	8.83929	3.58669	0.776393	1.66712	4.70139	4.77754	5.34378	2.77768	1.08295	2.67099	5.58049	5.3148	8.34106	7.58621
CYCL;2	61.9777	55.2613	64.66	50.0987	34.2525	40.1234	41.9168	43.9357	34.0609	30.6394	25.2918	21.3417	27.3463	8.01383	7.9923	10.5941	8.77751	9.40518	7.69512	6.58609	7.58364	6.82199	27.7977	28.7227	23.1259	14.6661	23.8054	23.0745	32.4844	32.1165	28.2554	19.5277	29.1689	30.4022
CYCP;2	17.2128	19.5664	15.672	20.6902	23.9369	19.601	15.8599	24.8826	8.21577	0.000884461	8.86276	5.42746	11.2945	7.34897	5.10337	4.86656	2.21069	4.36845	9.3323	16.9984	8.89714	6.18275	0.412029	0.0183886	0.0910283	16.6362	6.30034	8.39598	0.77682	2.85681e-15	5.71185e-18	13.6574	7.46042	8.93019
CYCD;2	2.40127	2.70904	1.55211	1.81949	1.85098	1.66787	1.7525	1.7295	9.5953e-73	1.87933e-44	1.68492e-22	6.02031e-40	2.68331e-51	4.80403e-285	1.0302e-254	0	6.55285e-217	8.42898e-99	0	2.73431e-90	0	9.94429e-99	1.2569	2.27421e-97	3.01017	0.921968	0.814201	3.92115e-36	4.69807e-23	4.72264e-21	4.09563	1.34968	0.997119	0.399619
CYCD;1	27.0375	21.4566	22.0927	23.9767	21.701	20.4261	27.4707	28.1853	33.4643	25.0272	27.2818	27.2038	26.4917	9.5448	8.06086	8.12686	7.75634	8.44166	17.913	15.5466	14.2147	10.091	10.6492	12.3276	11.6439	11.4401	15.3493	13.8248	11.6593	11.9269	11.8143	13.0644	17.5453	16.8017
CYCP;3	3.70712	9.35946	15.0293	12.1441	10.3318	8.09324	4.63816	3.37622	44.4451	56.0601	59.0918	54.2138	62.0797	6.94691	22.5489	21.4262	25.6276	17.9355	22.0624	21.1649	18.1969	23.3592	23.2435	29.2479	29.2504	26.8238	31.2623	23.9028	14.4861	17.9322	22.5369	16.2509	12.5052	15.084
CYCB;1	1.5762e-57	0.0757523	1.78326	22.8801	73.5208	9.80301	0.384488	0.0332777	7.65628	32.798	74.732	17.313	26.5315	14.5862	26.7873	26.6694	43.0906	53.0404	95.4573	187.305	6.29491	10.5817	15.9056	30.7861	72.067	171.943	31.4328	31.399	14.5601	25.1039	57.1961	135.991	14.2877	7.7978
CYCP;4	164.445	108.187	117.036	128.12	179.035	163.55	143.515	122.984	202.075	130.264	84.4019	126.721	181.11	59.3948	59.7955	49.1105	40.3962	35.8374	164.235	111.259	164.204	51.3792	69.889	68.4629	58.6358	132.297	87.7452	73.6195	83.1424	76.6177	67.1138	126.161	98.1699	94.5468
CYCA;1	0.132013	0.530116	27.9995	23.2896	2.97365	0.130696	0.208841	0.138975	0.324098	25.5595	20.1908	6.38807	2.18686	8.20119	13.5413	22.3418	46.7055	56.5697	21.7611	21.6402	1.60343	7.75343	16.7843	30.7496	36.6802	4.77066	10.4667	17.2321	15.5947	34.0922	48.1289	6.3235	5.18305	2.93974
CYCU;1	146.529	158.989	128.43	116.743	124.317	190.648	208.69	232.551	169.949	133.429	130.067	118.877	120.507	283.635	198.899	240.483	145.302	161.541	146.491	213.651	138.586	210.887	124.719	86.0447	76.8708	112.366	120.046	100.43	70.4997	59.9273	76.2477	92.6452	80.4162	99.1212
CYCL;3	19.3623	23.0344	33.6964	40.0023	39.6279	20.8341	19.0312	16.5713	43.7212	46.4139	42.1298	37.0449	43.5278	5.70618	8.95989	13.0262	8.23812	12.8597	5.24773	12.0907	7.8648	5.45083	6.26947	9.35615	10.8353	10.9226	4.43574	4.78977	6.75957	9.57179	13.9647	7.01741	5.70296	11.1374
CYCA;2	0.2297	1.00413	19.1201	3.70932	2.79433e-43	0.289199	0.884629	1.45896	6.43455e-31	1.43246	1.37073e-31	3.59032e-12	1.31798e-23	2.59624e-75	3.05791	5.55744	7.85754	7.60944	1.16899	0.587989	0	4.50483e-168	3.25498	6.38873	7.60183	0.000235005	0.00248404	8.3867	4.54523	8.21779	9.91342	1.54471e-05	1.3933e-07	1.40671e-16
CYCL;4	17.9685	30.8559	35.7657	32.5051	24.2242	17.7979	17.6015	19.3356	8.8875	11.472	8.84133	8.94252	8.74235	5.69428	4.31901	6.39877	5.77045	5.88736	6.61179	4.39491	5.39228	6.36075	7.57496	7.428	6.19992	4.42102	7.21199	7.00632	8.07284	7.81096	6.2812	4.58748	6.98286	8.40292
CYCB;2	96.2361	101.042	81.5129	17.1274	3.15087	7.26759	4.9577	4.28677	68.9446	30.5145	18.1473	24.1375	41.3325	31.1615	25.7387	23.9523	11.7155	14.7924	12.5044	6.9244	45.998	12.683	12.7922	17.1466	9.08818	2.5351	8.06392	4.05853	21.3587	11.5538	8.76204	1.5559	5.52783	15.4799
CYCB;3	0.0972435	0.289392	21.6375	42.7505	36.509	6.10133	0.467477	0.0792971	5.21613	28.3861	58.7222	14.801	13.8947	8.80699	16.0124	17.5565	45.2129	56.1275	53.8958	67.0105	4.48605	6.42904	18.1005	36.6243	43.3796	49.3861	20.6195	28.2008	16.6326	31.3973	48.8154	62.5366	9.59706	5.949
CYCU;2	11.4806	8.8674	3.66197	5.05391	4.99377	16.1431	23.6071	23.8797	35.4097	36.3606	39.4815	35.7675	34.2686	27.5921	34.882	39.1177	35.4491	37.6653	20.911	19.1051	35.777	56.1179	24.7575	20.3972	20.6636	17.6088	26.4254	22.2705	23.2623	22.014	22.6563	15.7868	27.769	26.2961
